# Supplementary material for: Interplay between Mutations and Efflux in Drug Resistant Clinical Isolates of Mycobacterium tuberculosis
Source: PubMed Central journal article supplement (PMC5406451; doi:10.3389/fmicb.2017.00711), 2017-04-27
Supplement: Table1.pdf [file Table1.pdf]

## Supplementary Material

### Interplay between mutations and efflux in drug resistant *Mycobacterium tuberculosis* clinical isolates

Diana Machado<sup>1§</sup>, Tatiane Coelho<sup>2,3§</sup>, João Perdigão<sup>4</sup>, Catarina Pereira<sup>4</sup>, Isabel Couto<sup>1</sup>, Isabel Portugal<sup>4</sup>, Raquel Maschmann<sup>2,5</sup>, Daniela Ramos<sup>3</sup>, Andrea von Groll<sup>3</sup>, Maria Lúcia Rossetti<sup>5,6</sup>, Pedro A. Silva<sup>2,3†</sup> and Miguel Viveiros<sup>1†\*</sup>

\* Correspondence: Miguel Viveiros: [mviveiros@ihmt.unl.pt](mailto:mviveiros@ihmt.unl.pt)

#### 1 Supplementary Table

**Supplementary Table 1. Putative efflux transporters described in *M. tuberculosis* and their substrates.**

| Transporter                     | Gene                                     | Function                                                     | Substrates                              | Family | Energy source | Reference   |
|---------------------------------|------------------------------------------|--------------------------------------------------------------|-----------------------------------------|--------|---------------|-------------|
| Rv0194                          | <i>Rv0194</i>                            | Probable transmembrane multidrug efflux pump                 | AMP; CHL; ERY; EtBr; NOV; STR; TET; VAN | ABC    | ATP           | 12          |
| PstB                            | <i>pstB</i><br>( <i>Rv0933</i> )         | Phosphate-transport ATP-binding protein                      | EMB; INH; FQs; RIF                      | ABC    | ATP           | 5;8;14;39   |
| Rv1218c–<br>Rv1217c             | <i>Rv1218c-<br/>Rv1217c</i>              | Probable tetracycline-transport integral membrane protein    | BL; BP; BSP; INH; NOV; PA; PD; PR; RIF  | ABC    | ATP           | 4;16;43     |
| Rv1458c-<br>Rv1457c-<br>Rv1456c | <i>Rv1458c-<br/>Rv1457c-<br/>Rv1456c</i> | Probable unidentified antibiotic-transport integral membrane | EMB; INH; RIF; STR                      | ABC    | ATP           | 22          |
| Rv1747                          | <i>Rv1747</i>                            | Probable conserved transmembrane ATP-binding protein         | EMB; EtBr; INH                          | ABC    | ATP           | 7;41        |
| BacA                            | <i>bacA</i><br>( <i>Rv1819c</i> )        | Probable drug-transport transmembrane ATP-binding protein    | AP; INH; RIF                            | ABC    | ATP           | 17;20;25;27 |

|                                 |                                                   |                                                                         |                                                               |            |            |                      |
|---------------------------------|---------------------------------------------------|-------------------------------------------------------------------------|---------------------------------------------------------------|------------|------------|----------------------|
| Rv2688c-<br>Rv2687c-<br>Rv2686c | Rv2688c-<br>Rv2687c-<br>Rv2686c                   | Antibiotic-transport ATP-binding protein                                | FQs                                                           | ABC        | ATP        | 7;33                 |
| DrrAB                           | Rv2936-<br>Rv2937                                 | Daunorubicin-dim-transport ATP-binding proteins                         | BCECF; CHL; DAU; DOX; EMB; ERY; EtBr; NOR; PUR; RIF; STR; TET | ABC        | ATP        | 7;9;27;32            |
| <b>Mmr</b>                      | <b><i>mmr</i></b><br><b>(Rv3065)</b>              | <b>Multidrug-transport integral membrane protein</b>                    | <b>Dyes; ERY; INH; PY; TPP</b>                                | <b>SMR</b> | <b>PMF</b> | <b>3;15;30;38</b>    |
| Rv1634                          | Rv1634                                            | Possible drug efflux membrane protein                                   | FQs; SKI                                                      | MFS        | PMF        | 14;23                |
| Rv0849                          | Rv0849                                            | Probable conserved integral membrane transport protein                  | BL; INH; RIF                                                  | MFS        | PMF        | 3                    |
| EmrB                            | <i>emrB</i><br>(Rv0783c)                          | Multidrug resistance integral membrane efflux protein                   | Several drugs                                                 | MFS        | PMF        | 14                   |
| <b>EfpA</b>                     | <b><i>efpA</i></b><br><b>(Rv2846c)</b>            | <b>Possible integral membrane efflux protein</b>                        | <b>ACR; EtBr; FQs; INH; RIF</b>                               | <b>MFS</b> | <b>PMF</b> | <b>19;27;30</b>      |
| <b>P55</b>                      | <b><i>p55</i></b><br><b>(Rv1410c)</b>             | <b>Aminoglycosides/tetracycline-transport integral membrane protein</b> | <b>AGs; CFZ; INH; RIF; TET</b>                                | <b>MFS</b> | <b>PMF</b> | <b>6;11;25;35</b>    |
| <b>Rv1258c</b>                  | <b><i>Rv1258c</i></b><br><b>(<i>tap-like</i>)</b> | <b>Probable conserved integral membrane transport protein</b>           | <b>EMB; ERY; EtBr; FQs; INH; RIF; SPE; TET</b>                | <b>MFS</b> | <b>PMF</b> | <b>1;25;30;37;40</b> |
| Stp                             | <i>stp</i><br>(Rv2333c)                           | Integral membrane drug efflux protein<br>Stp                            | RIF; SPE;TET                                                  | MFS        | PMF        | 36                   |
| Rv1877                          | Rv1877                                            | Conserved membrane protein                                              | ERY; KAN; TET                                                 | MFS        | PMF        | 14                   |
| <b>Rv2459</b>                   | <b><i>Rv2459</i></b><br><b>(<i>jefA</i>)</b>      | <b>Conserved integral membrane transport protein</b>                    | <b>EMB; EtBr; INH</b>                                         | <b>MFS</b> | <b>PMF</b> | <b>14;21;30</b>      |
| MmpL3                           | <i>mmpL3</i><br>(Rv0206c)                         | Probable conserved transmembrane transport protein                      | SQ109; BM212; AU; IA                                          | RND        | PMF        | 26;28;42             |
| MmpL4                           | <i>mmpL4</i><br>(Rv0450c)                         | Probable conserved transmembrane transport protein                      | CMB; MB; RIF                                                  | RND        | PMF        | 13;44                |
| MmpL5                           | <i>mmpL5</i><br>(Rv0676c)                         | Probable conserved transmembrane transport protein                      | AZ; BDQ; CFZ; TET                                             | RND        | PMF        | 24;31                |
| <b>MmpL7</b>                    | <b><i>mmpL7</i></b><br><b>(Rv2942)</b>            | <b>Probable conserved transmembrane transport protein</b>               | <b>INH</b>                                                    | <b>RND</b> | <b>PMF</b> | <b>18;30;34</b>      |
| MmpL8                           | <i>mmpL8</i><br>(Rv3823c)                         | Probable conserved transmembrane transport protein                      | SQ109                                                         | RND        | PMF        | 28                   |
| MmpL10                          | <i>mmpL10</i><br>(Rv1183)                         | Probable conserved transmembrane transport protein                      | SQ109                                                         | RND        | PMF        | 28                   |

|        |                               |                                   |          |                  |        |
|--------|-------------------------------|-----------------------------------|----------|------------------|--------|
|        | <i>iniB</i> ( <i>Rv0341</i> ) | Isoniazid- inducible protein IniB |          |                  |        |
| IniBAC | <i>iniA</i> ( <i>Rv0342</i> ) | Isoniazid- inducible protein IniA | ETB; INH | Membrane protein | - 2;10 |
|        | <i>iniC</i> ( <i>Rv0343</i> ) | Isoniazid- inducible protein IniC |          |                  |        |

ABC, ATP-binding cassette; ACR, acriflavine; AGs, aminoglycosides; AMP, ampicillin; AP, antimicrobial peptides; ATP, adenosine triphosphate; AU, adamantyl ureas; AZ, azoles; BCECF, 2',7'-bis-(2-carboxyethyl)-5(6)-carboxyfluorescein; BDQ, bedaquiline; BL,  $\beta$ -lactams; BP, biaryl piperazines; BSP, bisanilinopyrimidines; CFZ, clofazimine; CHL, chloramphenicol; CMB, carboxymycobactins; DAU, daunorubicin; DOX, doxorubicin; EMB, ethambutol; ERY, erythromycin; EtBr, ethidium bromide; FQs, fluoroquinolones; IA, indoleamides; INH, isoniazid; KAN, kanamycin; MB, mycobactins; MFS, major facilitator superfamily; NOR, norfloxacin; NOV, novobiocin; PA, pyrazolones; PD, pyridines; PMF, proton motive force; PR, pyrroles; PUR, puromycin; PY, pyronin Y; RIF, rifampicin; RND, resistance nodulation division; SMR, small multidrug resistance; SPE, spectinomycin; SKI, imidazoline SKI-356313; STR, streptomycin; TET, tetracycline; TPP, tetraphenylphosphonium; VAN, vancomycin. BM212 is a 1,5-diarylpyrrole; SQ109 is an ethylenediamine derivative of ethambutol.

Transporters in bold-type letter corresponded to those evaluated in the present study.

## References

1. Aínsa, J.A., Blokpoel, M.C., Otal, I., Young, D.B., De Smet, K.A., and Martín, C. (1998). Molecular cloning and characterization of Tap, a putative multidrug efflux pump present in *Mycobacterium fortuitum* and *Mycobacterium tuberculosis*. *J. Bacteriol.* 80, 5836-5843.
2. Alland, D., Kramnik, I., Weisbrod, T., Otsubo, L., Cerny, R., Miller, L., et al. (1998). Identification of differentially expressed mRNA in prokaryotic organisms by customized amplification libraries (DECAL): the effect of isoniazid on gene expression in *Mycobacterium tuberculosis*. *Proc. Natl. Acad. Sci. U.S.A.* 95, 13227-13232.
3. Balganes, M., Dinesh, N., Sharma, S., Kuruppath, S., Nair, A.V., and Sharma, U. (2012). Efflux pumps of *Mycobacterium tuberculosis* play a significant role in antituberculosis activity of potential drug candidates. *Antimicrob. Agents Chemother.* 56, 2643-2651. doi: 10.1128/AAC.06003-11
4. Balganes, M., Kuruppath, S., Marcel, N., Sharma, S., Nair, A., and Sharma, U. (2010). Rv1218c, an ABC transporter of *Mycobacterium tuberculosis* with implications in drug discovery. *Antimicrob. Agents Chemother.* 54, 5167-5172. doi: 10.1128/AAC.00610-10
5. Banerjee, S.K., Bhatt, K., Rana, S., Misra, P., and Chakraborti, P.K. (1996). Involvement of an efflux system in mediating high level of fluoroquinolone resistance in *Mycobacterium smegmatis*. *Biochem. Biophys. Res. Commun.* 226, 362-368. doi: 10.1006/bbrc.1996.1362
6. Bianco, M.V., Blanco, F.C., Imperiale, B., Forrellad, M.A., Rocha, R.V., Klepp, L.I., et al. (2011). Role of P27-P55 operon from *Mycobacterium tuberculosis* in the resistance to toxic compounds. *BMC Infect. Dis.* 11, 195. doi: 10.1186/1471-2334-11-195
7. Braibant, M., and Gilot, P. (2000). The ATP binding cassette (ABC) transport systems of *Mycobacterium tuberculosis*. *FEMS Microbiol. Rev.* 24, 449-467. doi: 10.1111/j.1574-6976.2000.tb00550.x

8. Braibant, M., Lefevre, P., Dewit, L., Peirs, P., Ooms, J., Hugyen, K., et al. (1996). A *Mycobacterium tuberculosis* gene cluster encoding proteins of a phosphate transporter homologous to the *E. coli* Pst system. *Gene*. 176, 171-176. doi: 10.1016/0378-1119(96)00242-9
9. Choudhuri, B.S., Bhakta, S., Barik, R., Joyoti, B., Kundu, M., and Chakrabarti, P. (2002). Overexpression and functional characterization of an ABC (ATP-binding cassette) transporter encoded by the genes *drvA* and *drvB* of *Mycobacterium tuberculosis*. *Biochem. J.* 367, 279-285. doi: 10.1042/bj20020615
10. Colangeli, R., Helb, D., Sridharan, S., Sun, J., Varma-Basil, M., Hazbon, M.H., et al. (2005). The *Mycobacterium tuberculosis iniA* gene is essential for activity of an efflux pump that confers drug tolerance to both isoniazid and ethambutol. *Mol. Microbiol.* 55, 1829-1840.
11. Da Silva, P., Bigi, F., Santangelo, M., Romano, M., Martín, C., Cataldi, A., et al. (2001). Characterization of P55, a multidrug efflux pump in *Mycobacterium bovis* and *Mycobacterium tuberculosis*. *Antimicrob. Agents Chemother.* 45, 800-804. doi: 10.1128/AAC.45.3.800-804.2001
12. Danilchanka, O., Mailaender, C., and Niederweis, M. (2008). Identification of a novel multidrug efflux pump of *Mycobacterium tuberculosis*. *Antimicrob. Agents Chemother.* 52, 2503-2511. doi: 10.1128/AAC.00298-08
13. de Knecht, G.J., Bruning, O., Marian, T., de Jong, M., van Belkum, A., Endtz, H.P., et al. (2013). Rifampicin-induced transcriptome response in rifampicin-resistant *Mycobacterium tuberculosis*. *Tuberculosis*. 93, 96-101. doi: 10.1016/j.tube.2012.10.013
14. De Rossi, E., Arrigo, P., Bellinzoni, M., Silva, P., Martin, C., Ainsa, J., et al. (2002). The multidrug transporters belonging to major facilitator superfamily in *Mycobacterium tuberculosis*. *Mol. Med.* 8, 714-724.
15. De Rossi, E., Branzoni, M., Cantoni, R., Milano, A., Riccardi, G., and Ciferri, O. (1998). *mmr*, a *Mycobacterium tuberculosis* gene conferring resistance to small cationic dyes and inhibitors. *J. Bacteriol.* 180, 6068-6071.
16. Dinesh, N., Sharma, S., and Balganes, M. (2013). Involvement of efflux pumps in the resistance to peptidoglycan synthesis inhibitors in *Mycobacterium tuberculosis*. *Antimicrob. Agents Chemother.* 57, 1941-1943. doi: 10.1128/AAC.01957-12
17. Domenech, P., Kobayashi, H., LeVier, K., Walker, G.C., and Barry, C.E. (2009). *BacA*, an ABC transporter involved in maintenance of chronic murine infections with *Mycobacterium tuberculosis*. *J. Bacteriol.* 191, 477-485. doi: 10.1128/JB.01132-08
18. Domenech, P., Reed, M., and Barry, C 3rd. (2005). Contribution of the *Mycobacterium tuberculosis* *MmpL* protein family to virulence and drug resistance. *Infect. Immun.* 73, 3492-3501. doi: 10.1128/IAI.73.6.3492-3501.2005
19. Doran, J.L., Pang, Y., Mdluli, K.E., Moran, A.J., Victor, T.C., Stokes, R.W., et al. (1997). *Mycobacterium tuberculosis efpA* encodes an efflux protein of the *QacA* transporter family. *Clin. Diagn. Lab. Immunol.* 4, 23-32.
20. Gupta, A.K., Katoch, V.M., Chauhan, D.S., Sharma, R., Singh M, Venkatesan, K., et al. (2010). Microarray analysis of efflux pump genes in multidrug-resistant *Mycobacterium tuberculosis* during stress induced by common anti-tuberculous drugs. *Microb. Drug Resist.* 16, 21-28. doi:10.1089/mdr.2009.0054.

21. Gupta, A.K., Reddy, V.P., Lavania, M., Chauhan, D.S., Venkatesan, K., Sharma, V.D., et al. (2010). *jeftA* (Rv2459), a drug efflux gene in *Mycobacterium tuberculosis* confers resistance to isoniazid and ethambutol. *Indian J. Med. Res.* 132, 176-188.
22. Hao, P., Shi-Liang, Z., Ju, L., Ya-Xin, D., Biao, H., Xu, W., et al. (2011). The role of ABC efflux pump, Rv1456c-Rv1457c-Rv1458c, from *Mycobacterium tuberculosis* clinical isolates in China. *Folia Microbiol.* 56, 549-553. doi: 10.1007/s12223-011-0080-7
23. Harris, K.K., Fay, A., Yan, G.H., Kunwar, P., Soggi, N.D., Pottabathini, N., et al. (2014). Novel imidazoline antimicrobial scaffold that inhibits DNA replication with activity against mycobacteria and drug resistant Gram-positive cocci. *ACS Chem. Biol.* 9, 2572-2583. doi: 10.1021/cb500573z
24. Hartkoorn, R., Uplekar, S., and Cole, S. (2014). Cross-resistance between clofazimine and bedaquiline through upregulation of MmpL5 in *Mycobacterium tuberculosis*. *Antimicrob. Agents Chemother.* 58, 2979-2981. doi: 10.1128/AAC.00037-14
25. Jiang, X., Zhang, W., Zhang, Y., Gao, F., Lu, C., Zhang, X., et al. (2008). Assessment of efflux pump gene expression in a clinical isolate *Mycobacterium tuberculosis* by real-time reverse transcription PCR. *Microb. Drug Resist.* 14, 7-11. doi:10.1089/mdr.2008.0772.
26. La Rosa, V., Poce, G., Canseco, J.O., Buroni, S., Pasca, M.R., Biava, M., et al. (2012). MmpL3 is the cellular target of the antitubercular pyrrole derivative BM212. *Antimicrob. Agents Chemother.* 56, 324-331. doi: 10.1128/AAC.05270-11
27. Li, G., Zhang, J., Guo, Q., Jiang, Y., Wei, J., Zhao, L.L., et al. (2015). Efflux pump gene expression in multidrug-resistant *Mycobacterium tuberculosis* clinical isolates. *PloS One.* 10, e0119013. doi: 10.1371/journal.pone.0119013
28. Li, W., Upadhyay, A., Fontes, F.L., North, E.J., Wang, Y., Crans, D.C., et al. (2014). Novel insights into the mechanism of inhibition of MmpL3, a target of multiple pharmacophores in *Mycobacterium tuberculosis*. *Antimicrob. Agents Chemother.* 58, 6413-6423. doi: 10.1128/AAC.03229-14
29. Lu, J., Liu, M., Wang, Y., Pang, Y., and Zhao, Z. (2014). Mechanisms of fluoroquinolone monoresistance in *Mycobacterium tuberculosis*. *FEMS Microbiol. Lett.* 353, 40-48. doi: 10.1111/1574-6968.12401
30. Machado, D., Couto, I., Perdigão, J., Rodrigues, L., Baptista, P., Portugal, I., et al. (2012). Contribution of efflux to the emergence of isoniazid and multidrug resistance in *Mycobacterium tuberculosis*. *PLoS One.* 7, e34538. doi: 10.1371/journal.pone.0034538
31. Milano, A., Pasca, M., Provvedi, R., Lucarelli, A., Manina, G., Ribeiro, A., et al. (2009). Azole resistance in *Mycobacterium tuberculosis* is mediated by the MmpS5–MmpL5 efflux system. *Tuberculosis.* 89, 84-90. doi: 10.1016/j.tube.2008.08.003.
32. Pang, Y., Lu, J., Wang, Y., Song, Y., Wang, S., and Zhao, Y. (2013). Study of the rifampin monoresistance mechanism in *Mycobacterium tuberculosis*. *Antimicrob. Agents Chemother.* 5, 893-900. doi: 10.1128/AAC.01024-12

33. Pasca, M., Gugliera, P., Arcesi, F., Bellinzoni, M., De Rossi, E., and Riccardi, G. (2004). Rv2686c-Rv2687c-Rv2688c, an ABC fluoroquinolone efflux pump in *Mycobacterium tuberculosis*. *Antimicrob. Agents Chemother.* 48, 3175-3178. doi: 10.1128/AAC.48.8.3175-3178.2004
34. Pasca, M., Gugliera, P., De Rossi, E., Zara, F., and Riccardi, G. (2005). *mmpL7* gene of *Mycobacterium tuberculosis* is responsible for isoniazid efflux in *Mycobacterium smegmatis*. *Antimicrob. Agents Chemother.* 49, 4775-4777. doi: 10.1128/AAC.49.11.4775-4777.2005
35. Ramón-García, S., Martín, C., Thompson, C., and Aínsa J. (2009). Role of the *Mycobacterium tuberculosis* P55 efflux pump in intrinsic drug resistance, oxidative stress responses, and growth. *Antimicrob. Agents Chemother.* 53, 3675-3682. doi: 10.1128/AAC.00550-09
36. Ramón-García, S., Martín, C., De Rossi, E., and Aínsa, J. (2007). Contribution of the Rv2333c efflux pump (the Stp protein) from *Mycobacterium tuberculosis* to intrinsic antibiotic resistance in *Mycobacterium bovis* BCG. *J. Antimicrob. Chemother.* 59, 544-547. doi: 10.1093/jac/dkl510
37. Ramón-García, S., Mick, V., Dainese, E., Martín, C., Thompson, C., De Rossi, E., et al. (2012). Functional and genetic characterization of the Tap efflux pump in *Mycobacterium bovis* BCG. *Antimicrob. Agents Chemother.* 56, 2074-2083.
38. Rodrigues, L., Villellas, C., Bailo, R., Viveiros, M., and Aínsa, J. (2013). Role of the Mmr efflux pump in drug resistance in *Mycobacterium tuberculosis*. *Antimicrob. Agents Chemother.* 57, 751-757. doi: 10.1128/AAC.01482-12
39. Sarin, J., Aggarwal, S., Chaba, R., Varshney, G.C., and Chakraborti, P.K. (2001).  $\beta$ -subunit of phosphate-specific transporter from *Mycobacterium tuberculosis* is a thermostable ATPase. *J. Biol. Chem.* 276, 44590-44597. doi: 10.1074/jbc.M105401200
40. Siddiqi, N., Das, R., Pathak, N., Banerjee, S., Ahmed, N., Katoch, V., et al. 2004. *Mycobacterium tuberculosis* isolate with a distinct genomic identity overexpresses a tap-like efflux pump. *Infection.* 32, 109-111. doi: 10.1007/s15010-004-3097-x
41. Spivey, V.L., Whalan, R.H., Hirst, E.M., Smerdon, S.J., and Buxton, R.S. (2013). An attenuated mutant of the Rv1747 ATP-binding cassette transporter of *Mycobacterium tuberculosis* and a mutant of its cognate kinase, PknF, show increased expression of the efflux pump-related *iniBAC* operon. *FEMS Microbiol Lett.* 347, 107-115. doi: 10.1111/1574-6968.12230
42. Tahlan, K., Wilson, R., Kastrinsky, D.B., Arora, K., Nair, V., Fischer, E., et al. (2012). SQ109 targets MmpL3, a membrane transporter of trehalose monomycolate involved in mycolic acid donation to the cell wall core of *Mycobacterium tuberculosis*. *Antimicrob. Agents Chemother.* 56, 1797-1809. doi: 10.1128/AAC.05270-11
43. Wang, K., Pei, H., Huang, B., Zhu, X., Zhang, J., Zhou, B., et al. (2013). The expression of ABC efflux pump, Rv1217c–Rv1218c, and its association with multidrug resistance of *Mycobacterium tuberculosis* in China. *Curr. Microbiol.* 66, 222-226. doi: 10.1007/s00284-012-0215-3
44. Wells, R.M., Jones, C.M., Xi, Z., Speer, A., Danilchanka, O., Doornbos, K.S., et al. (2013). Discovery of a siderophore export system essential for virulence of *Mycobacterium tuberculosis*. *PLoS Pathog.* 9, e1003120. doi: 10.1371/journal.ppat.1003120
